# Random Sequences Rapidly Evolve into *de novo* Promoters

Avihu H. Yona<sup>1,2</sup>, Eric J. Alm<sup>2,3,4</sup>, Jeff Gore<sup>1#</sup>

<sup>1</sup>Physics of Living Systems, Department of Physics, Massachusetts Institute of Technology, Cambridge, Massachusetts 02139, USA.

<sup>2</sup>Department of Biological Engineering, Massachusetts Institute of Technology, Cambridge, Massachusetts 02139, USA

<sup>3</sup>Broad Institute of MIT and Harvard, Cambridge, Massachusetts 02139, USA

<sup>4</sup>Center for Microbiome, Informatics and Therapeutics, Massachusetts Institute of Technology, Cambridge, Massachusetts 02139, USA

# Corresponding author [gore@mit.edu](mailto:gore@mit.edu)

## Abstract

1 How do new promoters evolve? The current notion is that new promoters emerge from duplication of  
2 existing promoters. To test whether promoters can instead evolve *de novo*, we replaced the lac promoter of  
3 *Escherichia coli* with various random sequences and evolved the cells in the presence of lactose. We found  
4 that a typical random sequence of ~100 bases requires only one mutation in order to mimic the canonical  
5 promoter and to enable growth on lactose. We further found that ~10% of random sequences could serve as  
6 active promoters even without any period of evolutionary adaptation. Such a short mutational distance from  
7 a random sequence to an active promoter may improve evolvability yet may also lead to undesirable  
8 accidental expression. Nevertheless, we found that across the *E. coli* genome, accidental expression is  
9 largely avoided by disfavoring codon combinations that resemble canonical promoter motifs. Our results  
10 suggest that the promoter recognition machinery has been tuned to allow high accessibility to new  
11 promoters, and similar findings might also be observed in higher organisms or in other motif recognition  
12 machineries, like transcription factor binding sites or protein-protein interactions.

## 13 **Introduction**

14 Promoters control the transcription of genes and therefore play a major role in evolutionary adaptation[1].  
15 The extensive study of promoters by genomic analysis[2–4], experimental protein-DNA interactions[5–7]  
16 and promoter libraries[8–11] has mostly revolved around highly refined promoters i.e. long-standing wild-  
17 type promoters and their derivatives. However, the emergence of new promoters, for example when cells  
18 need to activate horizontally transferred genes[12,13], is less understood. Recent studies have demonstrated  
19 how new promoters can emerge from duplication of existing promoters via genomic rearrangements[14,15],  
20 transposable elements[16,17], or by inter-species mobile elements[18]. Yet, little is known about promoters  
21 evolving *de novo*. The canonical promoter of *E. coli* is composed of two six-mer motifs - the ‘minus 10’  
22 TATAAT and the ‘minus 35’ TTGACA, which are separated by a spacer of  $17 \pm 2$  bases. The sequence space  
23 that encompasses these 12 bases (two six-mer motifs) is composed of  $\sim 17$  million options ( $4^{12}$ ). Due to the  
24 extreme size of sequence space, it is typically assumed that starting from a random sequence would require  
25 multiple mutations to have any significant level of expression. In cases where multiple mutations are  
26 necessary for functionality, the evolutionary search is difficult as the first mutation does not have a selective  
27 advantage until the other mutations appear, and evolving a promoter would then require the cell to copy a  
28 promoter from elsewhere in the genome.

29  
30 Exploring the fitness landscape of promoters in order to understand how non-functional sequences turn into  
31 functional promoters can be done artificially, by using pooled promoter libraries that allows the  
32 measurement of a large number of starting sequences. However, pool competition is less applicable for  
33 following an evolutionary process that requires mutational steps from inactive sequences as selection in pool  
34 is often dominated by a small fraction of the sequences that exhibit high activity. Therefore, in order to  
35 explore the fitness landscape of emerging promoters, in a similar way to evolution in natural ecologies, we  
36 utilized lab evolution methods. We evolved parallel populations, each starting with a different random  
37 sequence, for their ability to evolve new promoters. Following these evolving populations highlighted an  
38 unacknowledged way for new promoters to emerge by stepwise mutations from random sequences rather  
39 than by copying an existing promoter. Promoter activity was typically achieved by a single mutation and  
40 could be further increased in a stepwise manner by additional mutations that increased the similarity of the  
41 random sequence to the canonical promoter (TATAAT and TTGACA motifs). We therefore find a  
42 surprising flexibility in the evolution of the bacterial transcription network.

43 **Main Text**

44 To create an ecological scenario that can test how bacteria evolve *de novo* promoters, we sought a beneficial  
45 gene in the genome but not yet expressed, similarly to what might occur during horizontal gene transfer with  
46 a non-functional promoter. To this end, we modified the lac operon of *E. coli*: the lac metabolic genes  
47 (*LacZYA*) remain intact (including their 5'UTR), yet we deleted their promoter and replaced it by a variety  
48 of non-functional sequences. To broadly represent the non-functional sequence-space, we used random  
49 sequences of 103 bases (same length as the deleted WT lac promoter), which were computer-generated with  
50 the typical GC content of the *E. coli* genome (~50.8% GC, see [Methods](#)). In addition, the lac repressor  
51 (*LacI*) was deleted, and the lactose permease (*LacY*) was fluorescently labeled with YFP[19] for future  
52 quantification of expression. To avoid possible artifacts associated with plasmids, all modifications were  
53 made on the *E. coli* chromosome[20], so the engineered strains had a single copy of the metabolic genes  
54 needed for lactose utilization, yet without a functional promoter ([Figure 1A](#)). We began building such strains  
55 with random sequences as “promoters”, and already observed for the first strains obtained that they could  
56 not express the lac genes and thus they could not utilize or grow on lactose. This experimental observation  
57 was therefore consistent with the expectation that a random sequence is unlikely to be a functional promoter.

58  
59 To select for *de novo* lactose utilization we started evolution by serial dilution with the obtained strains, each  
60 carrying a different random sequence instead of the WT lac-operon promoter. We first focused on three such  
61 strains (termed RandSequence1, 2 and 3) and tested their ability to evolve expression of the lac operon, each  
62 in four replicates. As controls, we also evolved a strain carrying the WT lac promoter (termed WTPromoter),  
63 and another strain in which the entire lac operon was deleted (termed  $\Delta$ LacOperon). Before the evolution  
64 experiment, only the WTPromoter strain could utilize lactose ([Supp. Figure 1](#)). Therefore, to facilitate  
65 growth to low population sizes the evolution medium contained glycerol (0.05%) that the cells can utilize  
66 and lactose (0.2%) that the cells can only exploit if they express the lac operon. To isolate lactose-utilizing  
67 mutants, we routinely plated samples from the evolving populations on plates with lactose as the sole carbon  
68 source (M9+Lac) ([Figure 1B](#)). Remarkably, within 1-2 weeks of evolution (less than 100 generations), all of  
69 these populations exhibited lactose-utilizing abilities, except for the  $\Delta$ LacOperon population (Supplementary  
70 Information). These laboratory evolution results therefore argue that the populations carrying random  
71 sequences instead of a promoter can rapidly evolve expression. Next, we addressed the question of whether  
72 the solutions found during evolution were mutations in the random sequences or simply copying and pasting  
73 of existing promoters from elsewhere in the genome.

# Figure 1

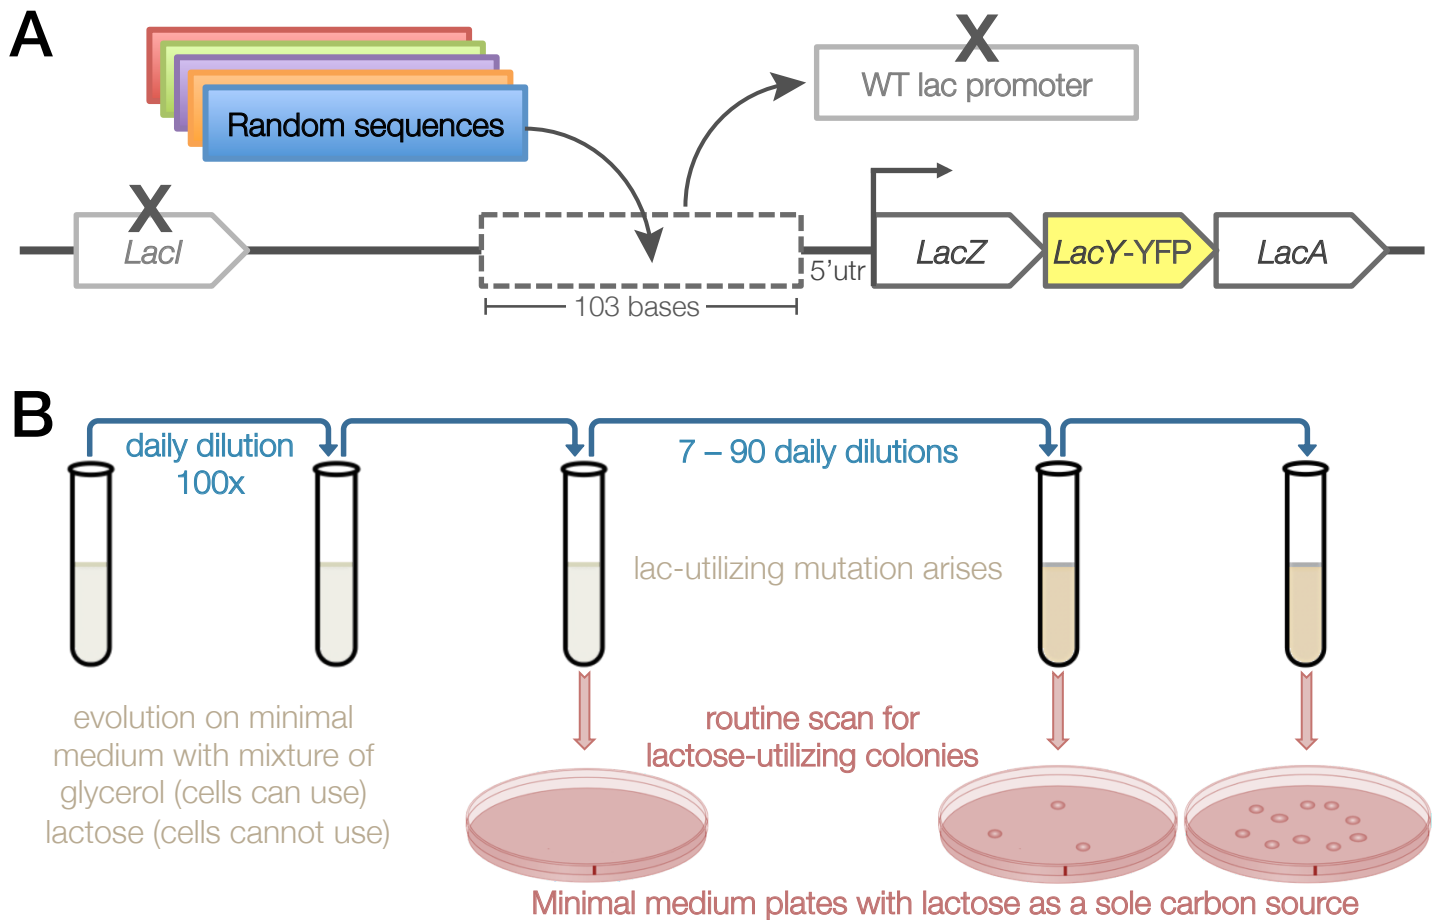

## Figure 1: Experimental setup for evolving promoters from random sequences

**(A)** We modified the chromosomal copy of the *lac* operon by replacing the WT *lac* promoter with a random sequence of the same length (103 bases) that abolished the cells' ability to utilize lactose. In addition, the *lacY* was tagged with YFP and the *lac* repressor (*lacI*) was deleted. **(B)** Cells were evolved by serial dilution in minimal medium containing both glycerol (0.05%), which the cells can utilize, and lactose (0.2%), which the cells cannot utilize unless they evolve de novo expression from the *lac* operon. During evolution, samples were routinely plated on minimal medium plates with lactose as a sole carbon source, for isolation of lactose-utilizing mutants.

74 To determine the molecular nature of the evolutionary adaptation, we sequenced the region upstream to the  
75 lac operon (from the beginning of the lac operon through the random sequence that replaced the WT lac  
76 promoter and up to the neighboring gene upstream). Strikingly, within each of the different random  
77 sequences a single mutation occurred, and continued evolution yielded additional mutations within the  
78 random sequences that further increased expression from the emerging promoters. All replicates showed the  
79 same mutations, yet sometimes in different order (Supp. Table 1). In order to confirm that the evolved  
80 ability to utilize lactose is because of the observed mutations, each mutation was inserted back into its  
81 relevant ancestral strain. Then, we assessed the lac-operon expression by YFP measurements (thanks to the  
82 *LacY*-YFP labeling) (Figure 2A). This experimental evolution demonstrates how non-functional sequences  
83 can rapidly become active promoters, in a stepwise manner, by acquiring successive mutations that  
84 gradually increase expression. Next, we aimed to determine the mechanism by which these mutations  
85 induced *de novo* expression from a random sequence.

86  
87 Looking at the context of the emerging mutations showed that expression was achieved by mimicking the  
88 canonical promoter motifs of *E. coli*[21], which is responsible for transcribing the majority of the genes in a  
89 growing *E. coli*. (i.e. the ‘minus 10’ TATAAT and the ‘minus 35’ TTGACA, separated by a spacer of 17±2  
90 bases). Each of the five mutations found during evolution of the three random sequences contributed for  
91 better capturing of the canonical promoter motifs (Figure 2B). The emerging promoters seem to comply with  
92 the higher importance of the TATAAT motif to promoter strength. Randseq1 and Randseq2 both captured 5  
93 out of 6 bases, and RandSeq3 captured the full 6 bases, while for the TTGACA motif they all captured 3 out  
94 of the 6 motif bases. Interestingly, although before evolution Randseq3 already captured 3/6 bases of the  
95 TTGACA motif plus 5/6 of the TATAAT motif, it was not sufficiently strong to induce expression.  
96 Randseq3 was not an active promoter before evolution presumably due to a short spacer (14 bases,  
97 compared with the ideal 17 bases spacer), which creates significant torsion of the DNA[22] and thus reduced  
98 attachment of the transcription machinery. Nevertheless, a single mutation in Randseq3 induced expression  
99 as it both allowed perfect capturing of the TATAAT motif (together with a preexisting TGn motif[23]).  
100 Therefore, *de novo* promoters are highly accessible because the different features that make a promoter, like  
101 sequence motifs and spacer size, can be compromised and still function.

## Figure 2

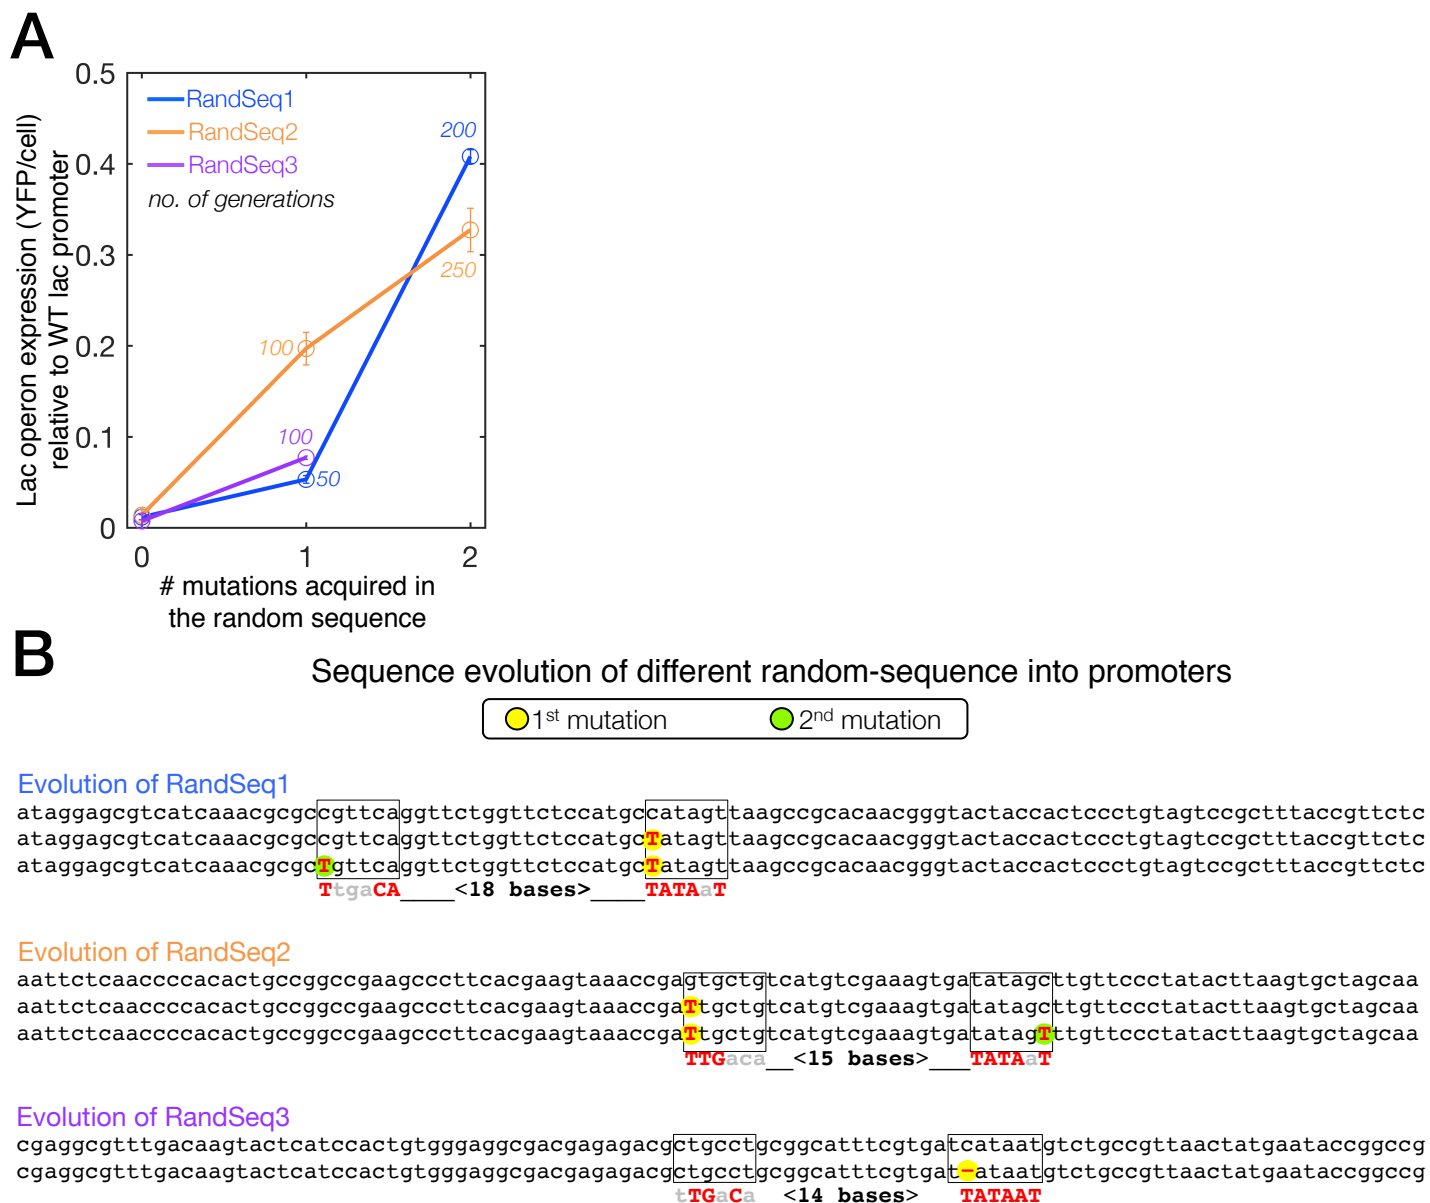

**Figure 2: From a random sequence to an active promoter by stepwise mutations that build a canonical promoter (example from three random sequences)**

**(A)** Evolved expression levels of the lac operon are plotted for three strains that carry different random sequences (blue, orange and purple) as a function of the number of acquired mutations. Expression level of 1 is defined as the expression measured from the WT lac promoter, and 0 is defined as the background read of the control strain  $\Delta$ LacOperon (in which the lac operon is deleted and no YFP gene was integrated). After accumulation of mutations, de novo expression is observed (as well as the ability to utilize lactose). The number of generations is indicated near each mutation. Mutations shown were verified by reinsertion into their non-evolved ancestors. **(B)** Sequences of the evolving promoters. For each strain, the top sequence is the random sequence before evolution, 2nd and 3rd lines are the random sequence with the evolved mutations (1st and 2nd mutations respectively). Increasing similarity to the canonical E. coli promoter motifs can be observed by the different mutations. For each evolving promoter the canonical promoter is shown as the bottom line where capital bases indicate a match.

102 The most surprising aspect of random sequences evolving into functional promoters was the fact that a  
103 single mutation was sufficient for turning on expression. Therefore, we predicted that if indeed a single  
104 mutation in a 103-base random sequence is often sufficient to generate an active promoter, there might also  
105 be a small portion of random sequences that are already active without the need of any mutation. Indeed,  
106 when testing all 40 strains (RandSeq1 to 40) for growth on M9+Lac plates before evolution, we observed  
107 that four of the strains (10%) formed colonies without acquiring any mutation in their random sequences.  
108 We scanned the random sequences of these already-active strains (RandSeq7, 12, 30, 34) and found regions  
109 with high similarity to the canonical  $\sigma^{70}$  promoter, equivalent to the similarities caused by the mutations  
110 mentioned earlier (Supp. Figure 2). Given that a single mutation might be sufficient to turn expression on,  
111 we proceeded with the strains that did not exhibit lac-operon activity, by putting them under selection for  
112 lactose utilization both by the abovementioned daily-dilution routine (in M9+GlyLac) and by directly  
113 screening for mutants that can form colonies on M9+Lac plates (Methods).

114  
115 Overall, selecting for expression of the lac operon was successful for all but 5% of the random-sequence  
116 strains (38/40). Analysis of all forty strains and their lac operon activating mutations showed that:  $10 \pm 4.7\%$   
117 were already active without any mutation (4/40),  $57.5 \pm 7.8\%$  found mutations within the 103 bases of the  
118 random sequence (23/40),  $12.5 \pm 5.2\%$  found mutations in the intergenic region just upstream to the random  
119 sequence (5/40) and  $15 \pm 5.7\%$  utilized genomic rearrangements that relocated an existing promoter of genes  
120 found upstream to the lac operon (6/40)(Figure 3A). YFP measurements indicate that all strains displayed  
121 substantial expression of the lac operon after acquiring the activating mutations (Figure 3B). To confirm that  
122 transcriptional read-through from the selection gene upstream did not facilitate the emergence of *de novo*  
123 promoters, we made six strains in a marker-free manner (Methods) and showed that their ability to evolve *de*  
124 *novo* promoters is similar to the rest of the strains. A typical random sequence of  $\sim 100$  bases is therefore not  
125 an active promoter but is frequently only one point mutation away from being an active promoter (For  
126 details on all mutations, their verifications and different outcomes between replicates see Supp. Table 1).

127

## Figure 3

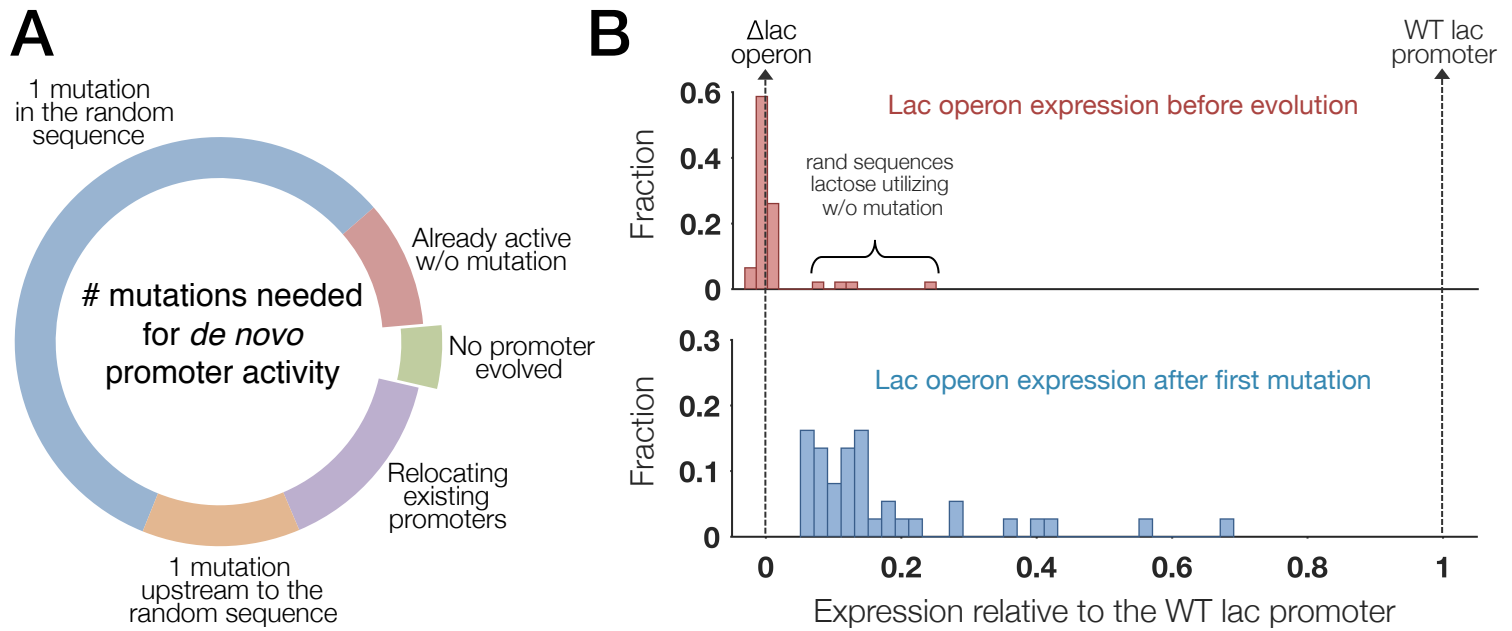

**Figure 3: For a typical random sequence of ~100 bases one point mutation is sufficient to function as a promoter**

**(A)** A summary of 40 different random sequences and the different type/number of mutations by which they acquire the ability to express the lac operon and to utilize lactose. ~10% of random sequences require no mutation for such expression of the lac operon that allows growing on lactose as a sole carbon source (red segment). For 57.5% of random sequences a single mutation found within the random sequence enabled expression of the lac operon and growth on lactose (similar to RandSeq 1,2,3 shown earlier)(blue segment). Other strains either relocated an existing promoter from another locus in the genome to be upstream to the lac promoter (15%, purple) or found point mutations in the intergenic region upstream to the random sequence (12.5%, orange). **(B)** Expression of the lac operon before evolution and after the first mutation that was associated with the ability to utilize lactose (upper and lower panel respectively). Measured are YFP reads normalized to OD600 where expression level of 1 is defined as the expression measured from the WT lac promoter (right vertical dashed line), and 0 is defined as the background read of the control strain  $\Delta$ LacOperon in which the lac operon is deleted and no YFP gene was integrated (left vertical dashed line). The ~10% of random sequences that conferred the ability to utilize lactose even before evolution are found to have significant expression from the lac operon (upper panel).



128 We performed lab evolution for *de novo* expression by selecting for a functional readout – the ability to  
129 grow on lactose. These evolution experiments found that the expression threshold of the lac operon, above  
130 which cells can grow on lactose, was often passed by a single mutation. To gain perspective on these  
131 surprising findings using a method that is not bound to a specific threshold, we calculated the mutational  
132 distance of random sequences from the canonical promoter of *E. coli*. We computationally scanned 10  
133 millions random sequences (of 103 bases) against the canonical promoter motifs and observed that a typical  
134 random sequence is likely to match 8 out of the 12 possible matches (of the two six-mers TTGACA and  
135 TATAAT, with spacing of  $17 \pm 2$ ). Interestingly, similar analysis performed on *E. coli*'s constitutive  
136 promoters showed that the majority of them have 9 out of 12 matches – only one more than the number of  
137 matches observed in random sequences of ~100 bases. Our experimental claim is therefore strengthened, as  
138 a random sequence typically requires only one mutation in order to reach the number of matches that  
139 characterize naturally occurring constitutive promoters. Furthermore, our computational analysis of random  
140 sequences implies that some random sequences may be active already as ~10% of random sequences have 9  
141 or more matches to the canonical promoter sequence ([Figure 4](#)).

## Figure 4

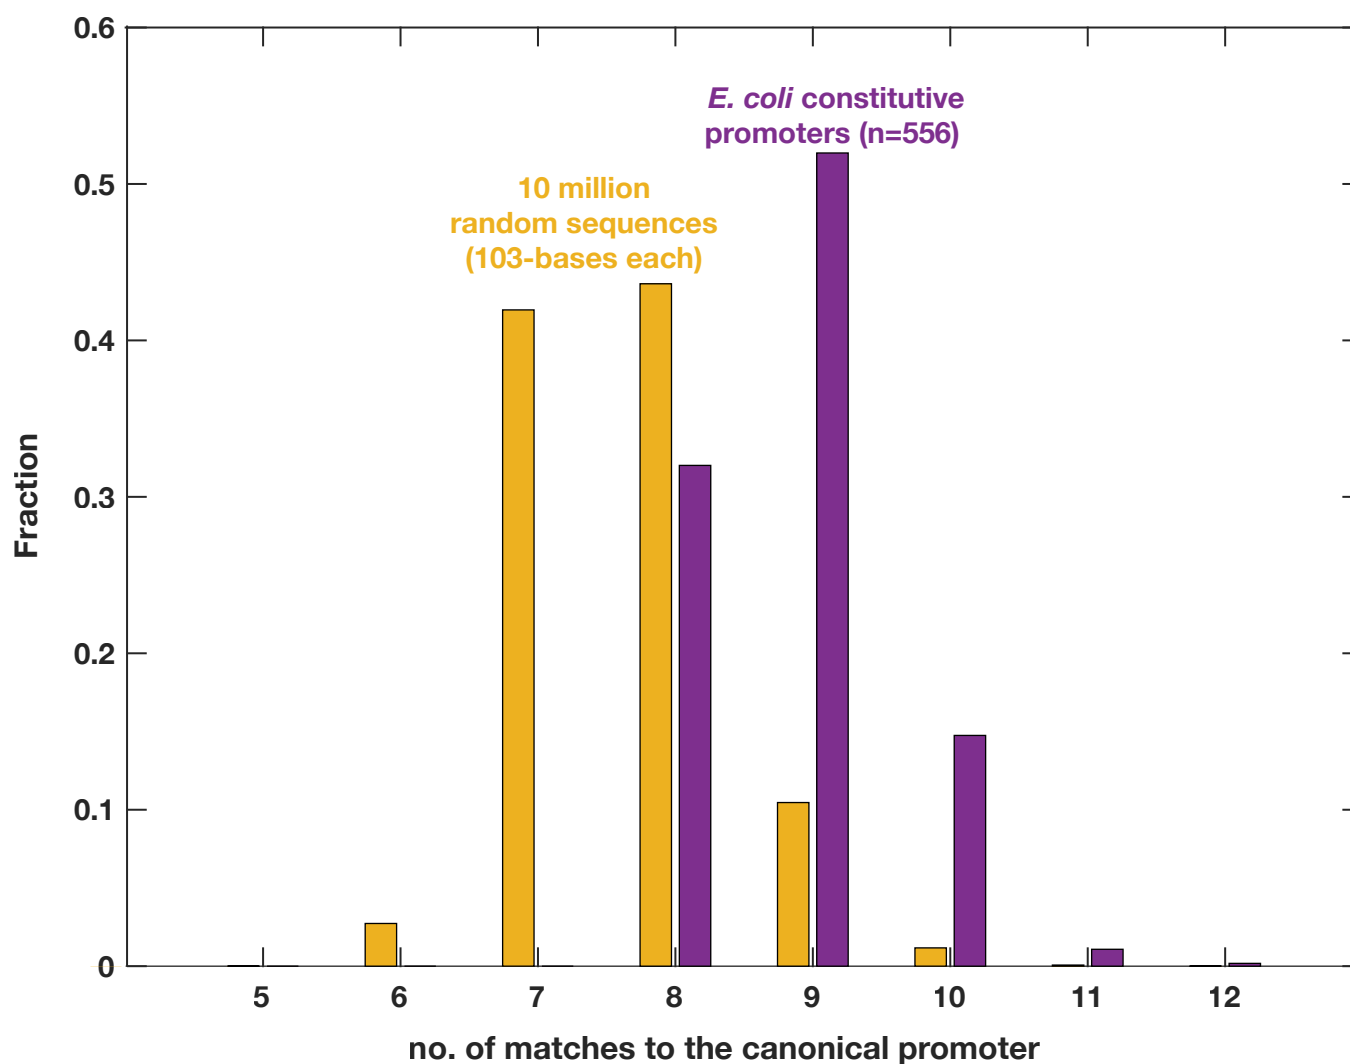

**Figure 4:**  
**Mutational distance to the canonical promoter - random sequences are one mutational step behind *E.coli* constitutive promoters**

The distribution of the number of matches to the canonical promoter (defined as TTGACA, a spacer of  $17 \pm 2$  bases, and TATAAT) is shown for 10 million random sequences (103 bases each) (orange), alongside the matches found for the 556 *E. coli* constitutive promoters (purple). The one mutation shift that separates the two distributions suggests that for many of the random sequences a single mutation can increase the number of matches to the number that characterize constitutive promoters in *E. coli*.

142 The short mutational distance from random sequences to active promoters may act as a double-edged sword.  
143 On the one hand, the ability to rapidly “turn on” expression may provide plasticity and high evolvability to  
144 the transcriptional network. On the other hand, this ability may also impose substantial costs, as such a  
145 promiscuous transcription machinery is prone to expression of unnecessary gene fragments[24]. Such  
146 accidental expression is not only wasteful but can also be harmful as it may interfere with the normal  
147 expression of the genes within which it occurs[25,26]. Our data suggest that ~10% of 100-base sequences  
148 are an active promoter, meaning that a typical ~1kb gene might naturally contain an accidental promoter  
149 inside its coding sequence. Therefore, we looked for strategies that *E. coli* might have taken to minimize  
150 accidental expression. Normal promoters typically occur in the intergenic region between genes and not  
151 within the coding region. We assessed the occurrence of accidental promoters in the middle of *E. coli* genes  
152 (i.e. between the start codon of each gene till its stop codon). This coding region composes 88% of the *E.*  
153 *coli* genome. Since each amino acid can be encoded by multiple synonymous codons, every gene in the  
154 genome can be encoded in many alternative ways. We hypothesized that the *E. coli* genome avoids codon  
155 combinations that create promoter motifs in the middle of genes. Using promoter prediction software[27,28],  
156 we found that the WT *E. coli* genome has much less accidental expression than what would be expected  
157 based on a random choice of codons to encode the same amino acids (while preserving the overall codon  
158 bias[29], [Figure 5A](#)). The *E. coli* genome has therefore likely been under selection to avoid this accidental  
159 expression within the coding region of genes.

160

161 To assess the optimization level of each gene separately, we compared the accidental expression score of  
162 each WT gene to the scores of a thousand alternative recoded versions. Remarkably, we found that ~40% of  
163 WT genes had accidental expression as low as the lowest decile of their recoded versions. Our data indicated  
164 that some *E. coli* genes minimize accidental expression more than others. Essential genes, for example,  
165 exhibit an even stronger signal of optimization compared to the general signal obtained for all genes together  
166 ([Figure 5B](#)). Essential genes are under stronger selective pressure to mitigate interference[30,31] and  
167 therefore they better avoid accidental expression presumably because it leads to collisions with RNA  
168 polymerases that transcribe them[32–34]. We observed similar results when we used a recoding method in  
169 which we just shuffled the codons of each gene, again indicating that the *E. coli* genome has been under  
170 selection to minimize accidental expression ([Supp. Figure 3, Methods](#)). To further validate that the WT *E.*  
171 *coli* has depleted promoter motifs within its coding region, we performed a straightforward analysis by  
172 unbiased counting of motif occurrences across the genome. The analysis showed that promoter motifs are  
173 depleted from the middle of genes, especially the TATAAT motif ([Methods, Supp. Table 2](#)). Reassuringly,  
174 among this group of depleted motifs we also found the Shine-Dalgarno sequence (ribosome binding  
175 site)[35]. Therefore, evolution may have acted to minimize accidental expression by avoiding codon  
176 combinations with similarity to promoter motifs, thereby allowing *E. coli* to benefit from flexible  
177 transcription machinery while counteracting its detrimental consequences.

## Figure 5

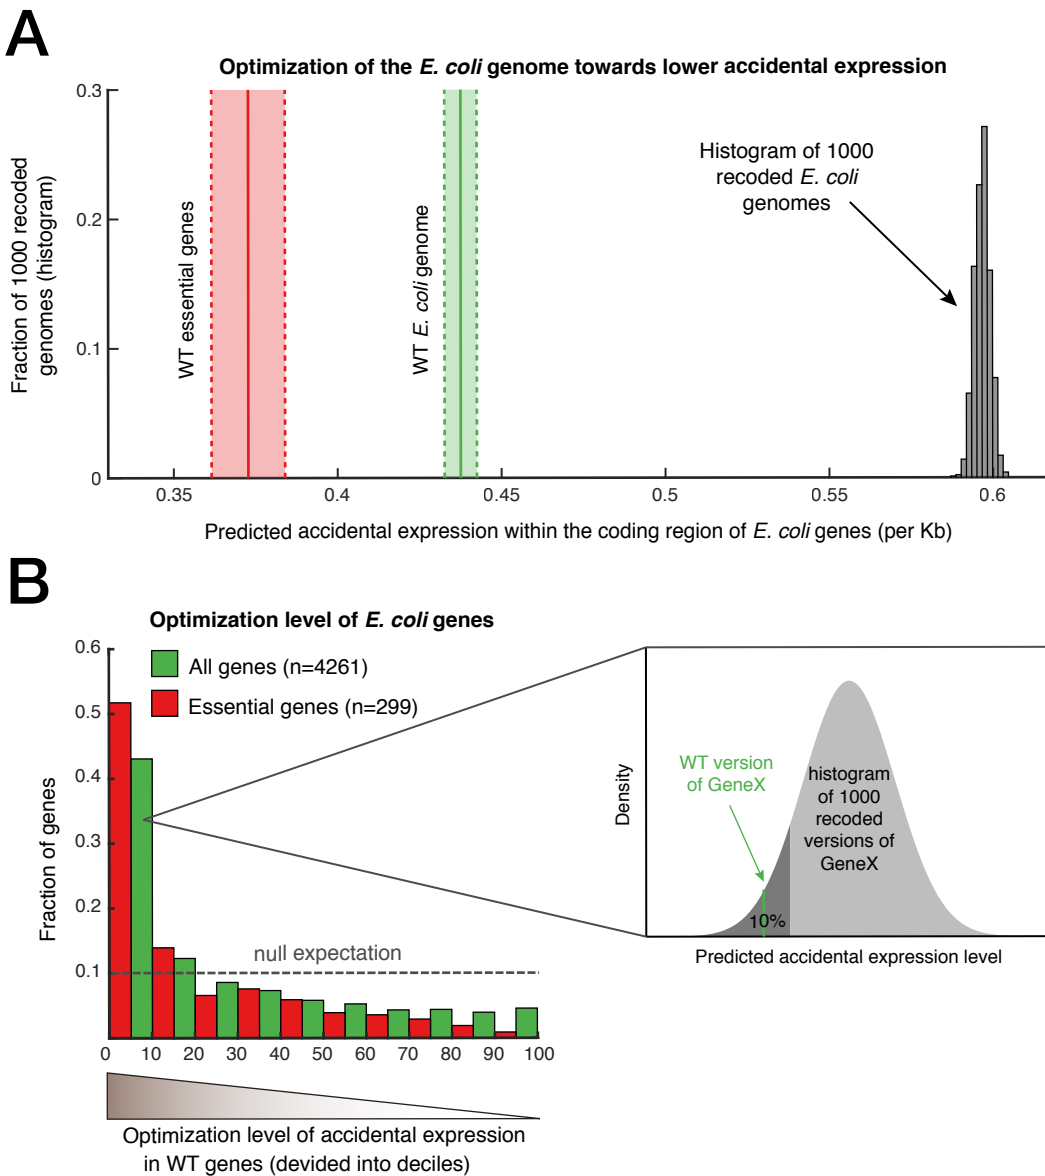

### Figure 5: Selection against the occurrence of random promoters in the coding region of genes

We evaluated promoters that accidentally occur across the genome by searching for promoter motifs in the coding region of *E. coli*. As a reference we did the same evaluation for 1000 alternative versions of the *E. coli* coding region by recoding each gene with synonymous codons while preserving the amino acid sequence and the codon bias. **(A)** Accidental expression of the thousand recoded versions of *E. coli* are shown by a histogram (grey), and the accidental expression of the WT *E. coli* genome is shown by vertical solid lines, for all genes in green, and for the subset of essential genes in red. Shaded areas around the vertical solid lines represent S.E. (delineated by vertical dashed lines). The WT version of the genome is significantly depleted for promoter motifs, indicating genome-wide minimization of accidental expression. **(B)** For each WT gene and its 1000 recoded versions a score for accidental expression was calculated. The WT gene was then ranked in the distribution of its 1000 recoded versions (see inset illustration). Ranking values are divided into deciles, for all WT genes (green), and for the subset of essential genes (red) demonstrating that ~40% of WT genes and more than 50% of essential genes are ranked at the most optimized decile. Dashed line shows expected histogram if WT genes had similar values to their recoded versions.

178 **Discussion**

179 Our study suggests that the sequence recognition of the transcription machinery is rather permissive and not  
180 restrictive[36] to the extent that the majority of non-specific sequences are on the verge of operating as  
181 active promoters. We found that the typical ~100-base sequence requires only a single mutation to become  
182 an active promoter. Consequently, some small portion of non-specific sequences can function as active  
183 promoters even without any mutation. This low sequence specificity of the transcription machinery may  
184 explain part of the pervasive transcription seen in unexpected locations in bacterial genomes[24] as well as  
185 the expression detected in large pools of plasmids that harbor degenerate sequences upstream to a reporter  
186 gene[37]. Despite the ability to avoid accidental expression by histone-like proteins[38,39] and by depletion  
187 of promoter-like motifs, accidental expression might not always be detrimental and may sometimes be  
188 selected for. When we analyzed accidental expression in toxin/antitoxin gene couples[40], we observed  
189 higher accidental expression in toxin genes compared with their antitoxin counterparts (Supp. Figure 4,  
190 Supplementary Information). Interestingly, when we split the accidental expression score into its ‘sense’  
191 (same strand as the gene) and ‘antisense’ (opposite strand) components, we observed that toxins had a much  
192 stronger accidental expression in their antisense direction compared to the sense direction. However, in the  
193 antitoxins, sense and antisense scores correlated, as largely seen genome-wide (Supp. Figure 5). This leads  
194 us to speculate that *E. coli* might have utilized accidental expression as a means to restrain gene  
195 expression[41,42] of specific genes, presumably by causing head-to-head collisions of RNA  
196 polymerases[32–34].

197  
198 Our main findings may be relevant to other organisms and to other DNA/RNA binding proteins like  
199 transcription factors. The mutational distance between random sequences to any sequence-feature should be  
200 considered for possible “accidental recognition” and for the ability of non-functional sequences to mutate  
201 into functional ones. We demonstrated that a random sequence is likely to capture 8 out of 12 motif bases of  
202 a promoter, while natural constitutive promoters usually capture 9 out of 12. Furthermore, our experiments  
203 demonstrated that this “missing” mutation that separates a random sequence from a functional one, is  
204 repeatedly found when unutilized lactose is present. Therefore, the implications of this study may also prove  
205 useful to synthetic biology designs, as one needs to be aware that spacer sequences might not always be non-  
206 functional as assumed. Moreover, spacer sequences can actually be properly designed to have lower  
207 probability for accidental functionality, for example a spacer that has particularly low chances of acting as a  
208 promoter (or ribosome binding site, or any other sequence feature).

209  
210 Tuning a recognition system to be in a metastable state so that a minimal step can cause significant changes  
211 might serve as a mechanism by which cells increase their adaptability. In our study the minimal evolutionary  
212 step (one mutation) was often sufficient to turn the transcription machinery from off to on. If two or more  
213 mutations were needed in order to create a promoter from a non-functional sequence, cells would face a  
214 much greater fitness-landscape barrier that would drastically reduce the ability to evolve *de novo* promoters.

215 The rapid rate at which new adaptive traits appear in nature is not always anticipated and the mechanisms  
216 underlying this rapid pace are not always clear. As part of the effort to reveal such mechanisms[43] our  
217 study suggests that the transcription machinery was tuned to be “probably approximately correct”[44] as  
218 means to rapidly evolve *de novo* promoters. Further work will be necessary to determine whether this  
219 flexibility in transcription is also present in higher-organisms and in other recognition processes.

220

## 221 **Acknowledgments**

222 We thank the Human Frontier Science Program for supporting A.H.Y. Special thanks for Idan Frumkin,  
223 Rebecca Herbst and members of the Gorelab and the Almlab for fruitful discussions. We thank the Xie lab  
224 for providing strains and Gene-Wei Li, Jean-Benoit Lalanne and Tami Lieberman for their helpful  
225 comments on the manuscript.

## 226 **Methods**

227 **Strains** – Strains were constructed using the Lambda-Red system[20], including integration of random  
228 sequences as promoters by using chloramphenicol resistance selection gene. Yet, for the strains with  
229 RandSeq9, 12, 15, 17, 18, 23, integration was done by the Lambda-Red-CRISPR/Cas9 system without  
230 introducing a selection marker, in order to exclude transcriptional read-through due to the expression of an  
231 upstream selection gene. The ancestral strain for all 40 random sequence strains, as well as for the control  
232 strains (WTpromoter and  $\Delta$ LacOperon) was SX700[19] in which the *lacY* was tagged with YFP. In addition,  
233 the *mutS* gene was deleted (by gentamycin resistance gene) to achieve higher yield in chromosomal  
234 integration using the lambda-red system[45] and as a potential accelerator of evolution due to increased  
235 mutation rate. For Randseq1, 2 and 40 we created additional strains from an ancestor in which the *mutS* was  
236 not deleted and after similar evolution the exact same mutations arise. In all strains, *lacI* was deleted (for all  
237 but the CRISPR/Cas9 strains, by spectinomycin resistance gene) and replaced by an extra double terminator  
238 (BioBricks BBa\_B0015) to prevent transcription read through from upstream genes.  
239

240 **Random sequences** – random sequences were generated computationally, 103 bases long (same length as  
241 the WT lac promoter they replaced). To prevent deviation from the overall GC content of *E. coli* (50.8%)  
242 sequences with GC context lower than 45.6% or higher than 56.0% were excluded. In addition, to avoid  
243 sequencing issues, sequences with homo-nucleotide stretches longer than five were excluded.  
244

245 **Selection for lactose utilization** – Lab evolution was performed on liquid cultures grown on M9+GlyLac by  
246 daily dilution of 1:100 into fresh medium. M9 base medium for 1L included 100uL CaCl<sub>2</sub> 1M, 2ml of  
247 MgSO<sub>4</sub> 1M, 10ml NH<sub>4</sub>Cl 2M, 200ml of M9 salts solution 5x (Sigma Aldrich). Concentrations of carbon  
248 source were 0.05% for glycerol and 0.2% for lactose for M9+GlyLac, 0.2% lactose for M9+Lac and 0.4%  
249 glycerol for M9+Gly (all in w/v). Cultures were routinely checked for increased yield at saturation and  
250 samples were plated on M9+Lac plates for isolation of colonies that can utilize lactose as a sole carbon  
251 source. In parallel to our liquid M9+GlyLac selection for lactose-utilization we also performed agar-plate  
252 selection by growing random-sequence strains on non-selective medium (M9+Gly) and then plated them  
253 while in late logarithmic phase on M9+Lac plates to select for lactose-utilizing colonies. All populations  
254 were evolved in parallel duplicates, but RandSeq1, 2, 3 had four replicates.  
255

256 **Quantifying growth and expression** – Growth curves were obtained by 24h measurements of OD<sub>600</sub> every  
257 10min. Lac operon expression was quantified by YFP florescence measurements. Both measurements  
258 performed by a Tecan M200 plate reader.  
259

260 ***E. coli* genomic data** - Lists of essential genes and prophage genes were downloaded from EcoGene[46], a  
261 list of toxin-antitoxin gene couples was obtained from Ecocyc[40], coding sequences of genes were  
262 downloaded from GeneBank (K-12 substr. MG1655, U00096).  
263

264 **Recoding the coding sequence of *E. coli* genes** – To create alternative versions of the coding region we  
265 recoded all translated genes in *E. coli* (n=4261) 1000 different times while preserving the amino acid  
266 sequence and codon bias. As another null model we also shuffled the codons of each gene in 1000  
267 permutations. Although a shuffled version of a gene does not preserve the amino acid sequence, it exactly  
268 preserves the GC content of each gene, and thus it controls for another aspect that may result in accidental  
269 expression.  
270

271 **Promoter prediction** – Using the output from BPROM[27,28] we obtained predicted expression scores by  
272 combining the scores of the minus-10 site and the minus-35 site and factoring in the prediction score (LDF)  
273 from the output by multiplying. In addition, we scanned sequences for promoters by running a sliding  
274 window with the canonical motif and identified regions with maximal agreement.  
275

276 **Six-mer analysis** - Looking for depleted and over represented motifs we counted the occurrences of all six-  
277 mers within the coding region of *E. coli*. We compiled a list of all 4096 possible six-mers and counted how  
278 many times each six-mer occurs in all WT coding region compared to the 1000 recoded versions. Then, we  
279 focused on six-mers that are significantly rare/abundant in WT version compared with their counting in the  
280 recoded versions.

# Supplementary Figure 1

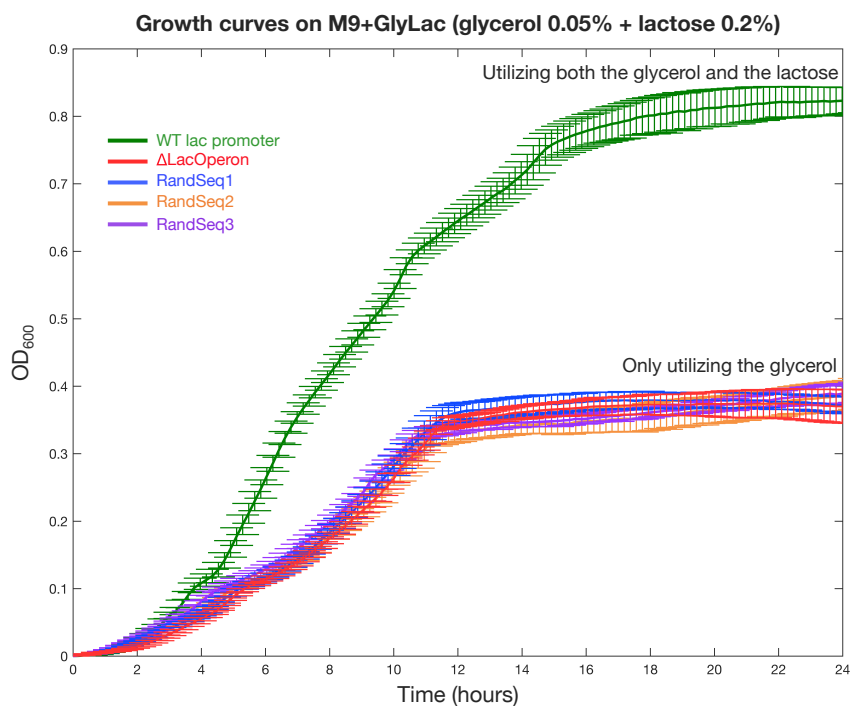

## Supplementary Figure 1:

### Replacing the WT lac promoter with a random sequence typically abolishes the ability to utilize lactose

Growth curve measurements of WTpromoter (green),  $\Delta$ LacOperon (red) and RandSequence1, 2, 3 (blue, orange and purple respectively). Shown in values of optical density (OD<sub>600</sub>) over time during continuous growth on minimal medium (M9+GlyLac, glycerol 0.05% plus lactose 0.2%) at 37°C. The random sequence strains can only utilize the glycerol in the medium and show a growth curve very similar to the  $\Delta$  LacOperon strain in which the lac genes were deleted. The difference in growth curves between the random sequence strains to WTpromoter reflects the adaptive potential for de novo expression of the lac operon.



# Supplementary Figure 2

Locating the promoter motifs of random sequences that enabled lactose utilization before evolution

## Evolution of RandSeq7

ctgctttgtactcatggtacgggaaggatcccagattctcagacacacggttgtgatggtgataataactgtgtgcttatggttttcccttcggaagtggcg  
TtGACA 18 TATAaT

## Evolution of RandSeq12

ccgcccgaattgaagcgaaccggatgatatcgatgatgatgtgaggattagccgatcagtaccaataccgaagagattatgtccttgatcagcaggcaggaga  
TTGACA 18 TATAAT

## Evolution of RandSeq30

gtcggcccggcgtccatcgactctatatcgtatataacttgccttataccaattctcaacctcaatgcttcacgattcaggctactagtgggtgaagttcac  
TTgAcA 16 TATAaT

## Evolution of RandSeq34

cagtttcattaaccaatggacagtatatataactaaggctatcgtgtgattgggaggagcgcctctctgaactcgtgtgctctttgtctcaccggaacgccttt  
TTgAca 17 TATAaT

## Supplementary Figure 2:

### Realizing promoter motifs in the random sequences that were already active promoters before evolution

Shown are the sequences of RandSequences7, 12, 30, 34 and the locations of promoter motifs in the random sequences. For these four strains, we observed the ability of cells to grow on lactose-only plates (M9+Lac) without any adaptation. Below each random sequence the canonical promoter is shown where capital bases indicate a match to the canonical motifs TTGACA and TATAAT.

## Supplementary Figure 3

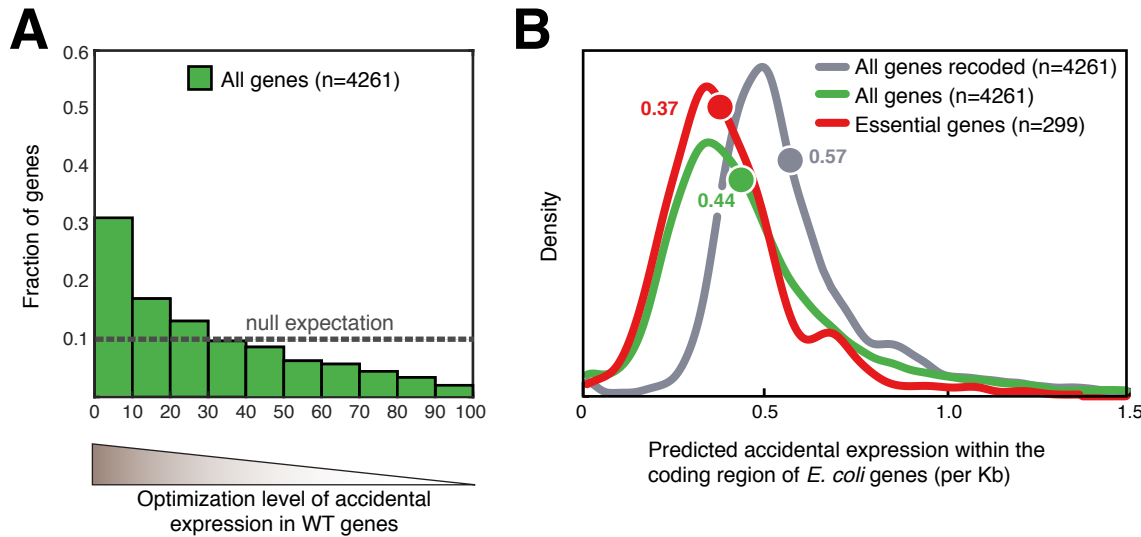

### Supplementary Figure 3:

#### Selection against the occurrence of random promoters in the genome – alternative null model

We evaluated promoters that accidentally occur across the genome by searching for promoter motifs in the coding region of *E. coli*. As a reference we did the same evaluation for 1000 alternative versions of the *E. coli* coding region by shuffling the codons of each gene, which maintains the GC content and codon bias of each gene. Comparing the WT genes to the 1000 shuffled versions allowed us to look for codon combinations that might have been under negative selection in the WT genome. For example, the shuffled versions can indicate if a combination of two specific codons is avoided in the WT genes because it creates a promoter motif inside a gene. **(A)** A score for accidental expression is calculated for each WT gene and a rank is assigned to each gene by its order in the scores of its 1000 shuffled versions. Shown is the histogram of ranks (divided into deciles) for all WT genes demonstrating that ~30% of WT genes are ranked at the most optimized decile. Dashed line shows expected histogram if WT genes had similar values to their shuffled versions. **(B)** Density plots of accidental expression in the coding sequences of *E. coli* genes. Distribution of a thousand shuffled versions of *E. coli* coding region are shown in grey (the value that represent each gene is the median of its 1000 shuffled versions), the accidental expression of the WT *E. coli* genes is shown in green, and for the subset of essential genes in red. The WT version of the genome is significantly more depleted for promoter motifs, indicating genome-wide minimization of accidental expression. This minimization is further emphasized for the essential genes.

# Supplementary Figure 4

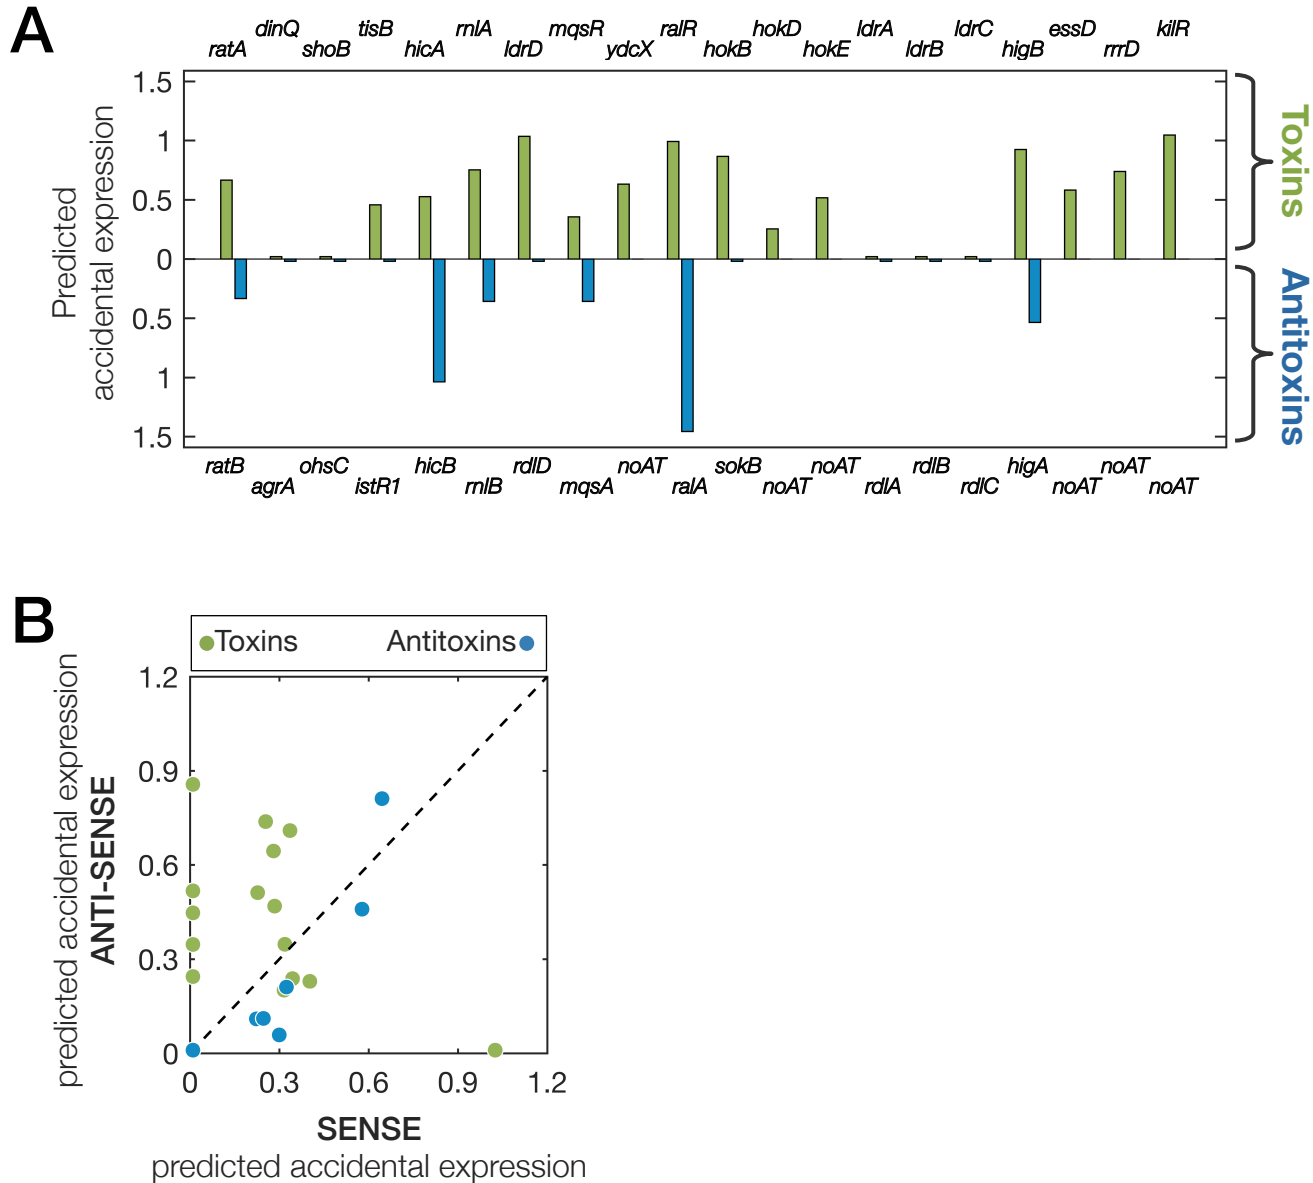

## Supplementary Figure 4:

### Accidental expression within toxin genes might be selected for as a means to control their expression

For each toxin-antitoxin couple the accidental expression scores examined for differences between toxins genes to their antitoxins and between accidental expressions in 'sense' (with the direction of the gene) compared to the 'antisense' (against the direction of the gene). **(A)** Accidental expression scores are compared between toxins (above the X-axis) and their antitoxin (below the X-axis) showing a tendency of toxins to have higher accidental expression compared with their antitoxin counterparts. **(B)** For both toxin and antitoxin genes the accidental expression was split into 'sense' and 'antisense' direction. While in antitoxin genes the two components tend to correlate (as generally seen in the genome, see Supplementary Figure 5) in the toxins genes the 'antisense' direction is significantly higher, which may imply that *E. coli* selects for maintaining 'antisense' accidental expression in order to control expression of genes whose higher dosages may harm the cells. Mechanistically, this is presumably due to the fact that antisense transcription collides with the RNA polymerase that expresses the toxin genes.

# Supplementary Figure 5

Predicted accidental expression within *E. coli* genes (n=4261)  
Correlation between SENSE and ANTI-SENSE direction

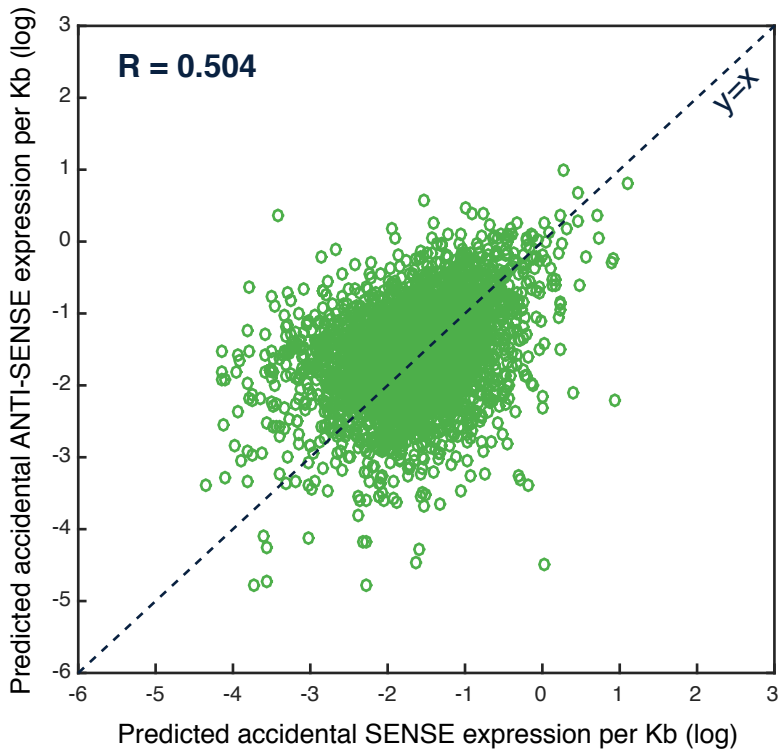

## Supplementary Figure 5:

### Genome-wide correlation between predicted accidental expression in 'sense' and 'anti-sense' directions

For each WT gene of *E. coli* we split the score obtained for accidental expression into its two contributing directions (each gene is represented by a green circle). A general correlation ( $R=0.504$ ) is observed between 'sense' and 'anti-sense' directions.

281 **Supplementary Information**

282

283 **The possibility of evolving lactose utilizing capabilities w/o the lac operon** – The fact that the  
284  $\Delta$ LacOperon strain did not evolve lactose utilizing capabilities indicates that in the random sequence strains  
285 lactose utilization arose due to actual activation of the lac operon, by the verified mutations, rather than due  
286 to dubious trans-acting mutations. Furthermore, the possibility of activating an *EBG* gene[47] (evolved  $\beta$ -  
287 galactosidase) is unlikely as it can only cover for the lack of *lacZ*, but still there is no active permease to  
288 replace the function of *lacY*.

289

290 **Expression activation by capturing an existing promoter or a mutation in the intergenic region**  
291 **upstream to the random sequence** –

292 For the random sequences listed in Extended Data Table.1 as evolved by capturing an existing promoter  
293 upstream, we observed various deletions in the intergenic region upstream to the lac operon. All of these  
294 deletions placed the lac operon in front of the upstream chloramphenicol selection gene. These deletions also  
295 eliminated the termination sequences that separated the lac operon from the genes upstream.

296 In strains where activating mutations appeared in the intergenic region, just upstream to the random  
297 sequence, *de novo* promoters were observed in some cases by mutations, in a similar manner to mutations  
298 that created *de novo* promoters in the random sequences (detailed in the mutations table). Yet, there was a  
299 group of point mutations, all at the same nucleotide, that occurred within the spacer of a predicted promoter  
300 that was experimentally inactive. Nevertheless, one of these mutations was sufficient for expression of the  
301 lac operon. The sequence of the predicted, yet inactive, promoter located in the intergenic region was  
302 (tcgaaa)gactggg**g**ccttcg(ttttat), where the minus-35 site is TcGAaA and the minus-10 site is TtTtAT. This  
303 promoter has a 14-base spacer and the ‘g’ in the middle of this spacer was mutated multiple times in  
304 different strain. In some cases from g to T, in other cases from g to A and once the g was deleted (1 base  
305 deletion). It is not clear what was the mechanism by which these mutations activate expression.

306 We hypothesize that random sequences that evolved expression via mutations in the intergenic  
307 region might do so because they could not find an activating mutation in the random sequence. For such  
308 sequences, a mutation in the random sequence that can induce expression might not exist. Therefore, we  
309 took such a sequence, RandSeq27, and computed mutations that might improve its chances of becoming an  
310 active promoter. To this end, we scanned the original RandSeq27 for maximal matches to the canonical  
311 promoter. Since there were multiple matches, we chose the maximal match with an optimal spacer of 17  
312 bases. Then, we introduce a point mutation that improved the minus-10 motif. After introducing this  
313 mutation into RandSeq27, it did not show promoter activity, yet after applying selection for growth on  
314 lactose (like in the library of ransom sequences) the strain found a second mutation that together with the  
315 first one we inserted exhibited expression of the lac operon:

316

317

318

319 RandSeq27 – inactive promoter:  
320 cggtcggtttataaacatgcgagaggaagctgtctgtgcgctgccagactcagagacccttatactacaccccgctggtgcgaatcatccaccactttaagt  
321

322 RandSeq27 + 1<sup>st</sup> mutation (computed) – still inactive promoter:  
323 cggtcggtttataaacatgcgagaggaagctgtctgtgcgctgccagactcagagacccttatactacaccccgctggtgcgTatcatccaccactttaagt  
324

325 RandSeq27 + 2<sup>nd</sup> mutation (via selection) – active promoter:  
326 cggtcggtttataaacatgcgagaggaagctgtctgtgcgctgccagactcagagaccctt-tactacaccccgctggtgcgTatcatccaccactttaagt  
327 TTtACT-----17-----TATcAT  
328  
329

330 This might imply that such sequences are two mutations away from functioning as active promoters.

331

332 **The different costs of accidental expression and the motivation to focus on toxin-antitoxin gene**  
333 **couples** – Accidental expression has a global cost due to waste of resources and occupying cellular  
334 machineries. In addition there is also a cost that is due to interference of specific genes. We observed that  
335 depletion of accidental expression is more emphasized in essential genes and is less observed in foreign  
336 genes like toxin and antitoxin prophage genes. Besides the stronger selective pressure to mitigate  
337 interference in essential genes, additional possible reasons for these differences may include: (a) foreign  
338 genes have been in the *E. coli* genome for shorter time and thus their expected optimization level is lower,  
339 and (b) foreign genes may have lower GC content than *E. coli*, which may affect accidental expression[48]  
340 as promoter motifs are AT-rich. To decipher between these potential factors, we therefore focused on  
341 toxin/anti-toxin gene couples[40], as for each couple the age in the *E. coli* genome is presumably the same,  
342 and they have similar GC content. Nonetheless, the anti-toxin gene is more important to the *E. coli* fitness  
343 than its toxin counterpart. Indeed, we observed lower accidental expression in anti-toxin genes compared  
344 with toxin genes. This result implies that for each gene the level of avoiding accidental expression is mainly  
345 dependent on how important to the fitness it is to have this gene expressed without interference.

346

347 **Toxin Anti-toxin couples** – When analyzing toxin-antitoxin gene couples for potential differences in their  
348 accidental expression, especially between sense and anti-sense orientations, we excluded gene couples  
349 whose orientation in the genome could not lead us to meaningful conclusions. Specifically, we excluded  
350 gene couples for the following reasons:

- 351 a) Toxin and antitoxin genes were overlapping, hence internal expression affects both (e.g. *ibsA* nad *sibA*).  
352 b) Couples that had this orientation Antitoxin → Toxin → in which antisense expression from within the  
353 toxin gene also influences the adjacent upstream antitoxin (e.g. *yafQ* and *dinJ*).  
354 c) Couples where the annotated promoter of the antitoxin gene is within the toxin gene and thus interference  
355 to the toxin is from a canonical functional promoter (e.g. *symE* and *symR*).

## References

- 356 1. McAdams HH, Srinivasan B, Arkin AP (2004) The evolution of genetic regulatory systems in  
357 bacteria. *Nat Rev Genet* 5: 169–178. doi:10.1038/nrg1292.
- 358 2. Manson McGuire A, Church GM (2000) Predicting regulons and their cis-regulatory motifs by  
359 comparative genomics. *Nucleic Acids Res* 28: 4523–4530.
- 360 3. Gama-Castro S, Jiménez-Jacinto V, Peralta-Gil M, Santos-Zavaleta A, Peñaloza-Spinola MI, et al.  
361 (2008) RegulonDB (version 6.0): gene regulation model of *Escherichia coli* K-12 beyond  
362 transcription, active (experimental) annotated promoters and Textpresso navigation. *Nucleic Acids*  
363 *Res* 36: D120–4. doi:10.1093/nar/gkm994.
- 364 4. Novichkov PS, Rodionov DA, Stavrovskaya ED, Novichkova ES, Kazakov AE, et al. (2010)  
365 RegPredict: an integrated system for regulon inference in prokaryotes by comparative genomics  
366 approach. *Nucleic Acids Res* 38: W299–307. doi:10.1093/nar/gkq531.
- 367 5. Cho B-K, Zengler K, Qiu Y, Park YS, Knight EM, et al. (2009) The transcription unit architecture of  
368 the *Escherichia coli* genome. *Nat Biotechnol* 27: 1043–1049. doi:10.1038/nbt.1582.
- 369 6. Grainger DC, Hurd D, Harrison M, Holdstock J, Busby SJW (2005) Studies of the distribution of  
370 *Escherichia coli* cAMP-receptor protein and RNA polymerase along the *E. coli* chromosome. *Proc*  
371 *Natl Acad Sci U S A* 102: 17693–17698. doi:10.1073/pnas.0506687102.
- 372 7. Wade JT, Castro Roa D, Grainger DC, Hurd D, Busby SJW, et al. (2006) Extensive functional  
373 overlap between sigma factors in *Escherichia coli*. *Nat Struct Mol Biol* 13: 806–814.  
374 doi:10.1038/nsmb1130.
- 375 8. Kinney JB, Murugan A, Callan CG, Cox EC (2010) Using deep sequencing to characterize the  
376 biophysical mechanism of a transcriptional regulatory sequence. *Proc Natl Acad Sci U S A* 107:  
377 9158–9163. doi:10.1073/pnas.1004290107.
- 378 9. Kosuri S, Goodman DB, Cambray G, Mutalik VK, Gao Y, et al. (2013) Composability of regulatory  
379 sequences controlling transcription and translation in *Escherichia coli*. *Proc Natl Acad Sci U S A*  
380 110: 14024–14029. doi:10.1073/pnas.1301301110.
- 381 10. Sharon E, Kalma Y, Sharp A, Raveh-Sadka T, Levo M, et al. (2012) Inferring gene regulatory logic  
382 from high-throughput measurements of thousands of systematically designed promoters. *Nat*  
383 *Biotechnol* 30: 521–530. doi:10.1038/nbt.2205.
- 384 11. Rhodius VA, Segall-Shapiro TH, Sharon BD, Ghodasara A, Orlova E, et al. (2013) Design of  
385 orthogonal genetic switches based on a crosstalk map of  $\sigma_s$ , anti- $\sigma_s$ , and promoters. *Mol Syst Biol* 9:  
386 702. doi:10.1038/msb.2013.58.
- 387 12. Ochman H, Lawrence JG, Groisman EA (2000) Lateral gene transfer and the nature of bacterial  
388 innovation. *Nature* 405: 299–304. doi:10.1038/35012500.
- 389 13. Smillie CS, Smith MB, Friedman J, Cordero OX, David LA, et al. (2011) Ecology drives a global  
390 network of gene exchange connecting the human microbiome. *Nature* 480: 241–244.  
391 doi:10.1038/nature10571.
- 392 14. Somvanshi VS, Sloup RE, Crawford JM, Martin AR, Heidt AJ, et al. (2012) A single promoter  
393 inversion switches *Photobacterium* between pathogenic and mutualistic states. *Science* 337: 88–93.  
394 doi:10.1126/science.1216641.
- 395 15. Blount ZD, Barrick JE, Davidson CJ, Lenski RE (2012) Genomic analysis of a key innovation in an  
396 experimental *Escherichia coli* population. *Nature* 489: 513–518. doi:10.1038/nature11514.
- 397 16. Chu ND, Clarke SA, Timberlake S, Polz MF, Grossman AD, et al. (2017) A Mobile Element in  
398 *mutS* Drives Hypermutation in a Marine *Vibrio*. *MBio* 8. doi:10.1128/mBio.02045-16.
- 399 17. Matus-Garcia M, Nijveen H, van Passel MWJ (2012) Promoter propagation in prokaryotes. *Nucleic*  
400 *Acids Res* 40: 10032–10040. doi:10.1093/nar/gks787.
- 401 18. Oren Y, Smith MB, Johns NI, Kaplan Zeevi M, Biran D, et al. (2014) Transfer of noncoding DNA  
402 drives regulatory rewiring in bacteria. *Proc Natl Acad Sci U S A* 111: 16112–16117.  
403 doi:10.1073/pnas.1413272111.
- 404 19. Choi PJ, Cai L, Frieda K, Xie XS (2008) A stochastic single-molecule event triggers phenotype  
405 switching of a bacterial cell. *Science* 322: 442–446. doi:10.1126/science.1161427.
- 406 20. Datsenko KA, Wanner BL (2000) One-step inactivation of chromosomal genes in *Escherichia coli*  
407 K-12 using PCR products. *Proc Natl Acad Sci U S A* 97: 6640–6645. doi:10.1073/pnas.120163297.
- 408 21. Lissner S, Margalit H (1993) Compilation of *E. coli* mRNA promoter sequences. *Nucleic Acids Res*  
409 21: 1507–1516.
- 410 22. Gore J, Bryant Z, Nöllmann M, Le MU, Cozzarelli NR, et al. (2006) DNA overwinds when

- 411 stretched. *Nature* 442: 836–839. doi:10.1038/nature04974.
- 412 23. Kumar A, Malloch RA, Fujita N, Smillie DA, Ishihama A, et al. (1993) The minus 35-recognition  
413 region of *Escherichia coli* sigma 70 is inessential for initiation of transcription at an “extended minus  
414 10” promoter. *J Mol Biol* 232: 406–418. doi:10.1006/jmbi.1993.1400.
- 415 24. Wade JT, Grainger DC (2014) Pervasive transcription: illuminating the dark matter of bacterial  
416 transcriptomes. *Nat Rev Microbiol* 12: 647–653. doi:10.1038/nrmicro3316.
- 417 25. Palmer AC, Ahlgren-Berg A, Egan JB, Dodd IB, Shearwin KE (2009) Potent transcriptional  
418 interference by pausing of RNA polymerases over a downstream promoter. *Mol Cell* 34: 545–555.  
419 doi:10.1016/j.molcel.2009.04.018.
- 420 26. Shearwin KE, Callen BP, Egan JB (2005) Transcriptional interference--a crash course. *Trends Genet*  
421 21: 339–345. doi:10.1016/j.tig.2005.04.009.
- 422 27. Solovyev V, Salamov A (2011) Automatic Annotation of Microbial Genomes and Metagenomic  
423 Sequences. In: Robert W. Li, editor. *Automatic Annotation of Microbial Genomes and Metagenomic*  
424 *Sequences. In Metagenomics and its Applications in Agriculture, Biomedicine and Environmental*  
425 *Studies.* Nova Science Publishers. pp. 61–78.
- 426 28. Solovyev V, Salamov A (2015) BPROM - Prediction of bacterial promoters. Available:  
427 <http://linux1.softberry.com/berry.phtml?topic=bprom&group=programs&subgroup=gfindb>.
- 428 29. Chan PP, Lowe TM (2009) GtRNAdb: a database of transfer RNA genes detected in genomic  
429 sequence. *Nucleic Acids Res* 37: D93-7. doi:10.1093/nar/gkn787.
- 430 30. Rocha EPC, Danchin A (2003) Essentiality, not expressiveness, drives gene-strand bias in bacteria.  
431 *Nat Genet* 34: 377–378. doi:10.1038/ng1209.
- 432 31. Price MN, Alm EJ, Arkin AP (2005) Interruptions in gene expression drive highly expressed  
433 operons to the leading strand of DNA replication. *Nucleic Acids Res* 33: 3224–3234.  
434 doi:10.1093/nar/gki638.
- 435 32. Hobson DJ, Wei W, Steinmetz LM, Svejstrup JQ (2012) RNA polymerase II collision interrupts  
436 convergent transcription. *Mol Cell* 48: 365–374. doi:10.1016/j.molcel.2012.08.027.
- 437 33. Crampton N, Bonass WA, Kirkham J, Rivetti C, Thomson NH (2006) Collision events between  
438 RNA polymerases in convergent transcription studied by atomic force microscopy. *Nucleic Acids*  
439 *Res* 34: 5416–5425. doi:10.1093/nar/gkl668.
- 440 34. Callen BP, Shearwin KE, Egan JB (2004) Transcriptional interference between convergent  
441 promoters caused by elongation over the promoter. *Mol Cell* 14: 647–656.  
442 doi:10.1016/j.molcel.2004.05.010.
- 443 35. Li G-W, Oh E, Weissman JS (2012) The anti-Shine-Dalgarno sequence drives translational pausing  
444 and codon choice in bacteria. *Nature* 484: 538–541. doi:10.1038/nature10965.
- 445 36. Struhl K (1999) Fundamentally different logic of gene regulation in eukaryotes and prokaryotes.  
446 *Cell* 98: 1–4. doi:10.1016/S0092-8674(00)80599-1.
- 447 37. Wolf L, Silander OK, van Nimwegen E (2015) Expression noise facilitates the evolution of gene  
448 regulation. *Elife* 4. doi:10.7554/eLife.05856.
- 449 38. Singh SS, Singh N, Bonocora RP, Fitzgerald DM, Wade JT, et al. (2014) Widespread suppression of  
450 intragenic transcription initiation by H-NS. *Genes Dev* 28: 214–219. doi:10.1101/gad.234336.113.
- 451 39. Landick R, Wade JT, Grainger DC (2015) H-NS and RNA polymerase: a love-hate relationship?  
452 *Curr Opin Microbiol* 24: 53–59. doi:10.1016/j.mib.2015.01.009.
- 453 40. Keseler IM, Mackie A, Peralta-Gil M, Santos-Zavaleta A, Gama-Castro S, et al. (2013) EcoCyc:  
454 fusing model organism databases with systems biology. *Nucleic Acids Res* 41: D605-12.  
455 doi:10.1093/nar/gks1027.
- 456 41. Dornenburg JE, Devita AM, Palumbo MJ, Wade JT (2010) Widespread antisense transcription in  
457 *Escherichia coli*. *MBio* 1. doi:10.1128/mBio.00024-10.
- 458 42. Brophy JA, Voigt CA (2016) Antisense transcription as a tool to tune gene expression. *Mol Syst*  
459 *Biol* 12: 854–854. doi:10.15252/msb.20156540.
- 460 43. Yona AH, Frumkin I, Pilpel Y (2015) A relay race on the evolutionary adaptation spectrum. *Cell*  
461 163: 549–559. doi:10.1016/j.cell.2015.10.005.
- 462 44. Leslie Valiant (2013) *Probably Approximately Correct.* Basic Books. 195 p.
- 463 45. Wang HH, Isaacs FJ, Carr PA, Sun ZZ, Xu G, et al. (2009) Programming cells by multiplex genome  
464 engineering and accelerated evolution. *Nature* 460: 894–898. doi:10.1038/nature08187.
- 465 46. Zhou J, Rudd KE (2013) EcoGene 3.0. *Nucleic Acids Res* 41: D613-24. doi:10.1093/nar/gks1235.
- 466 47. Hall BG (2003) The EBG system of *E. coli*: origin and evolution of a novel beta-galactosidase for



- 467 the metabolism of lactose. *Genetica* 118: 143–156.  
468 48. Lamberte LE, Baniulyte G, Singh SS, Stringer AM, Bonocora RP, et al. (2017) Horizontally  
469 acquired AT-rich genes in *Escherichia coli* cause toxicity by sequestering RNA polymerase. *Nat*  
470 *Microbiol* 2: 16249. doi:10.1038/nmicrobiol.2016.249.  
471
